# Supplementary material for: Tiger sharks support the characterization of the world’s largest seagrass ecosystem
Source: PubMed Central journal article supplement (PMC9626626; doi:10.1038/s41467-022-33926-1), 2022-11-01
Supplement: 41467_2022_33926_MOESM2_ESM.pdf [file 41467_2022_33926_MOESM2_ESM.pdf]

**Title:** Supplemental Movie 1. Video evidence of tiger shark habitat use of seagrass habitat.

**Description:** Example of video footage obtained from free-ranging, camera-mounted tiger shark on the Little Bahama Bank, with clear evidence of seagrass composing the benthic seafloor habitat.
